# Supplementary material
Source: PubMed Central journal article supplement (PMC6359950)
Supplement: NIHMS1516892-supplement-1.pdf [file NIHMS1516892-supplement-1.pdf]

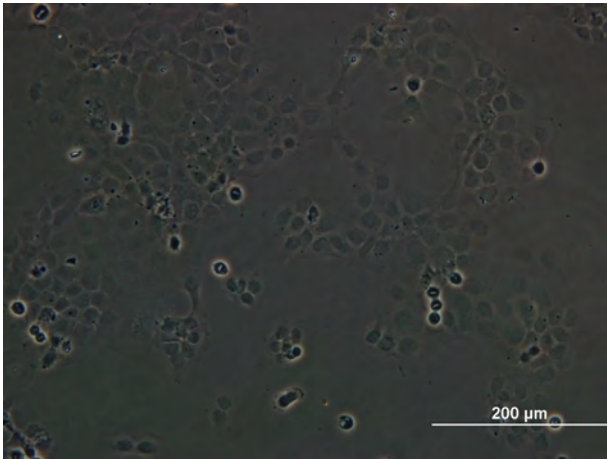

ADCCS1

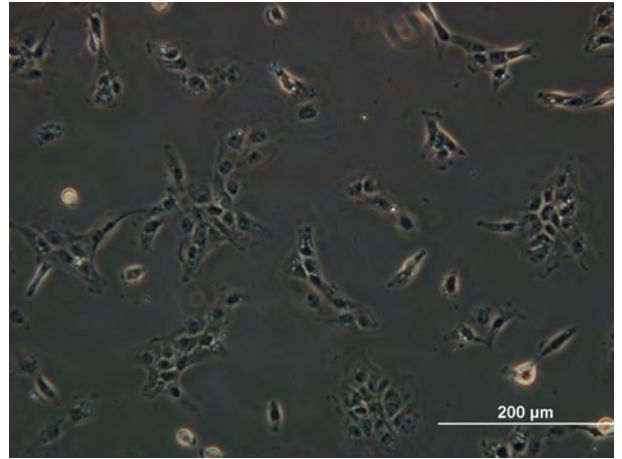

ADCCR1

Supplemental Figure 1:

A.

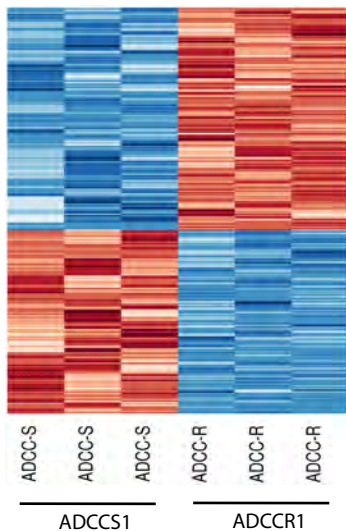

B.

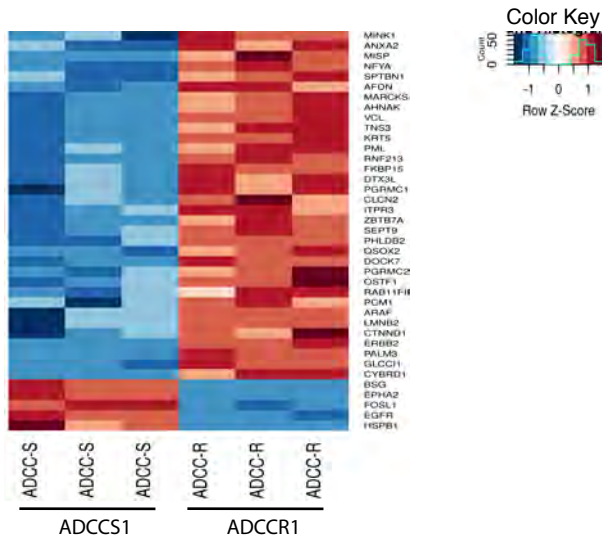

C.

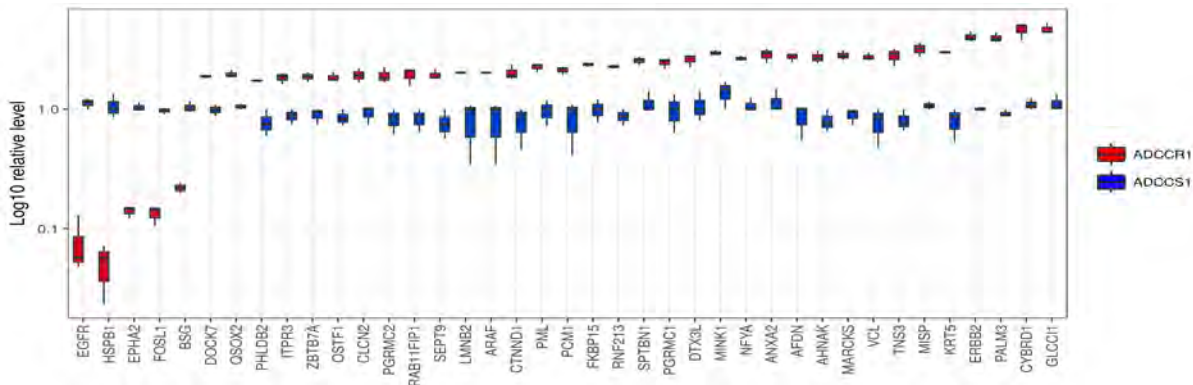

Supplemental Figure 2:

A.

HSPB1

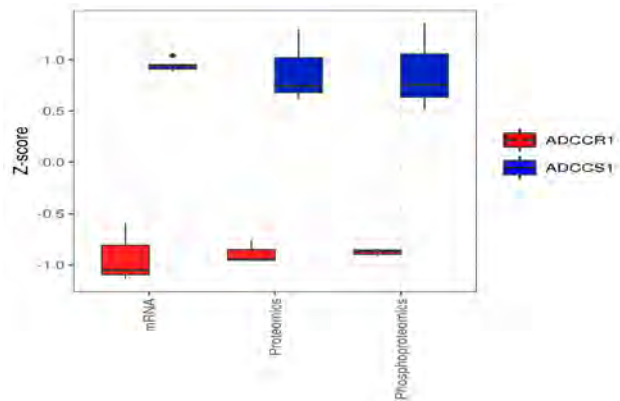

B.

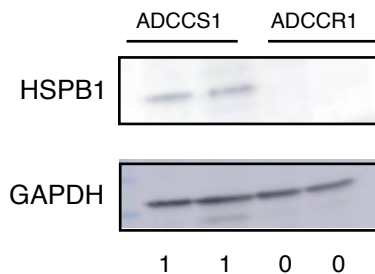

C.

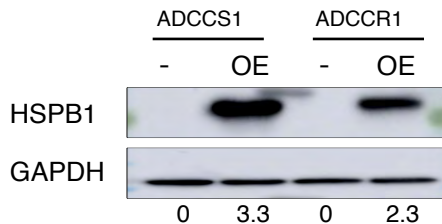

D.

ADCC Assay

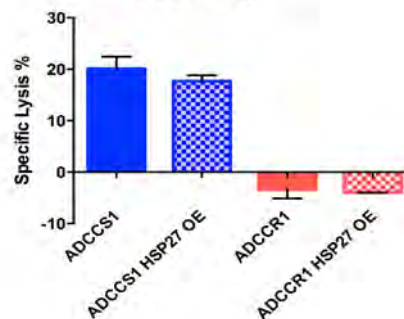

E.

CD74

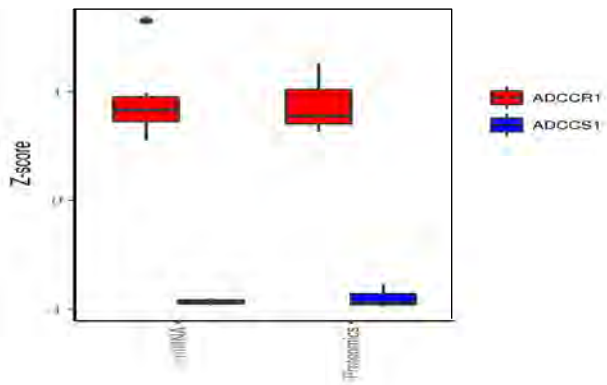

F.

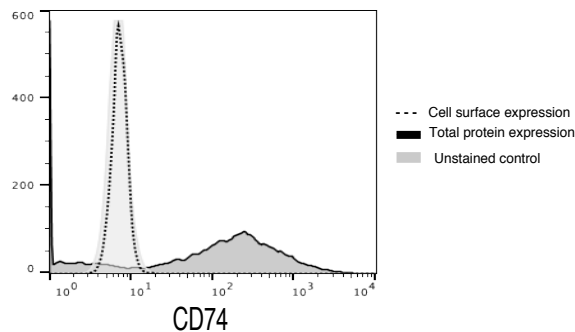

A.

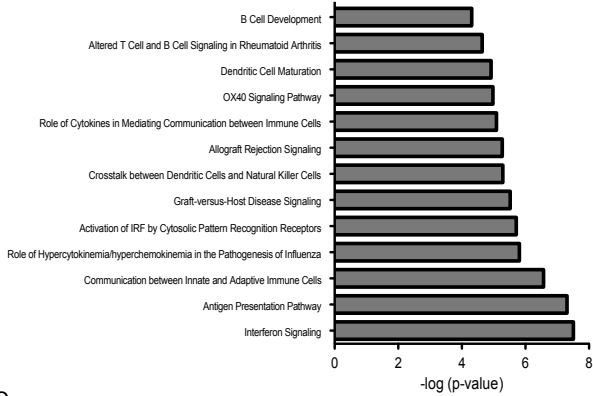

B.

| Upstream Regulator | Molecule Type           | p-value of overlap |
|--------------------|-------------------------|--------------------|
| IFNG               | Cytokine                | 1.62E-35           |
| IFNA2              | Cytokine                | 7.17E-33           |
| IFNL1              | Cytokine                | 4.63E-31           |
| TLR3               | Transmembrane receptor  | 3.66E-30           |
| IRF7               | Transcription regulator | 5.84E-28           |
| IL1RN              | Cytokine                | 2.01E-26           |
| TNF                | Cytokine                | 7.03E-26           |
| poly rI:rC-RNA     | Biologic drug           | 2.42E-24           |
| MAPK1              | Kinase                  | 2.52E-24           |
| PRL                | Cytokine                | 3.09E-24           |
| STAT3              | Transcription regulator | 4.28E-23           |
| IRF3               | Transcription regulator | 1.50E-20           |

C.

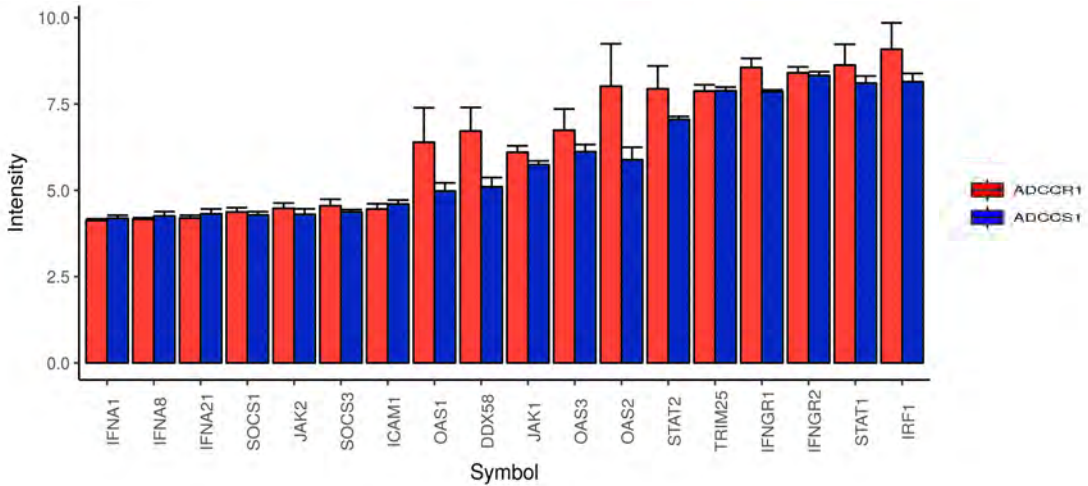

Supplemental Figure 4:

# ADCC Assay

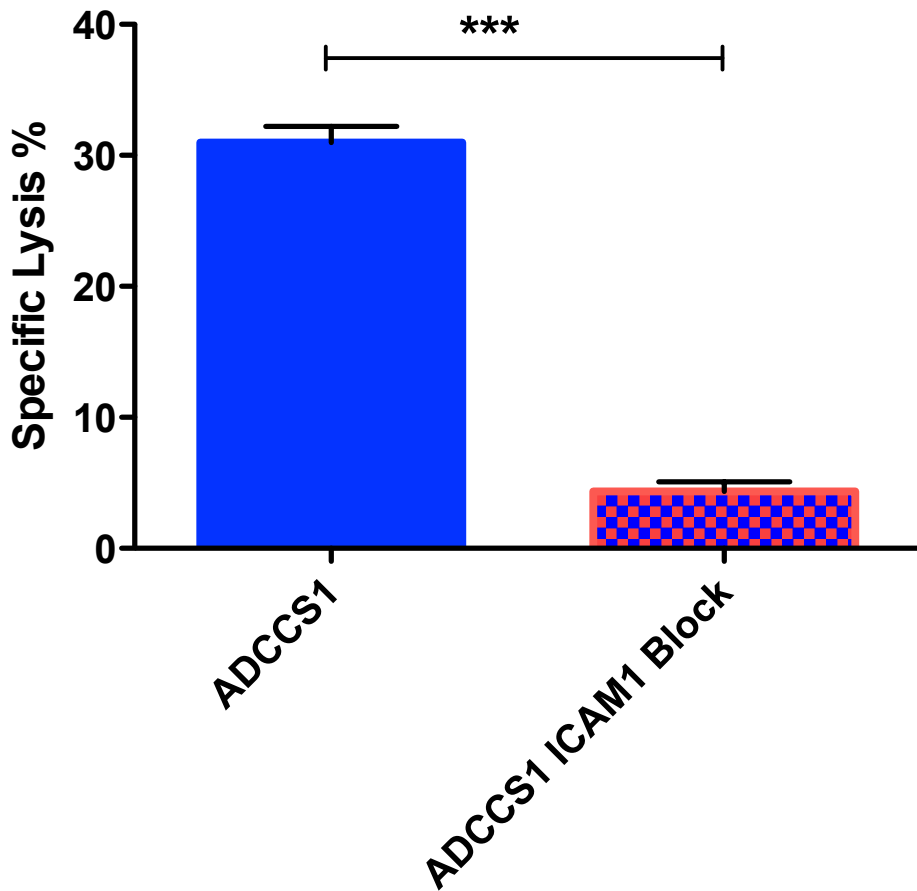

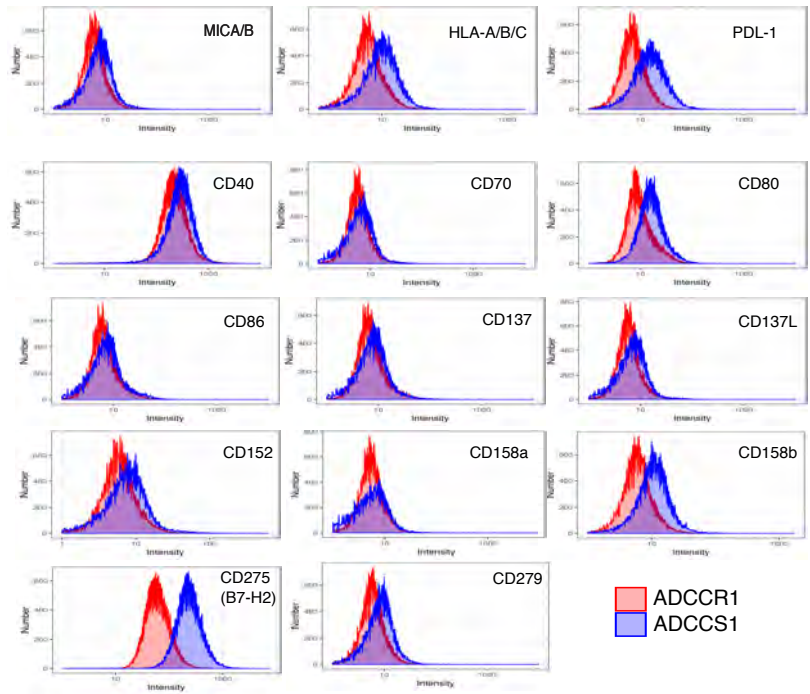

Supplemental Figure 6:

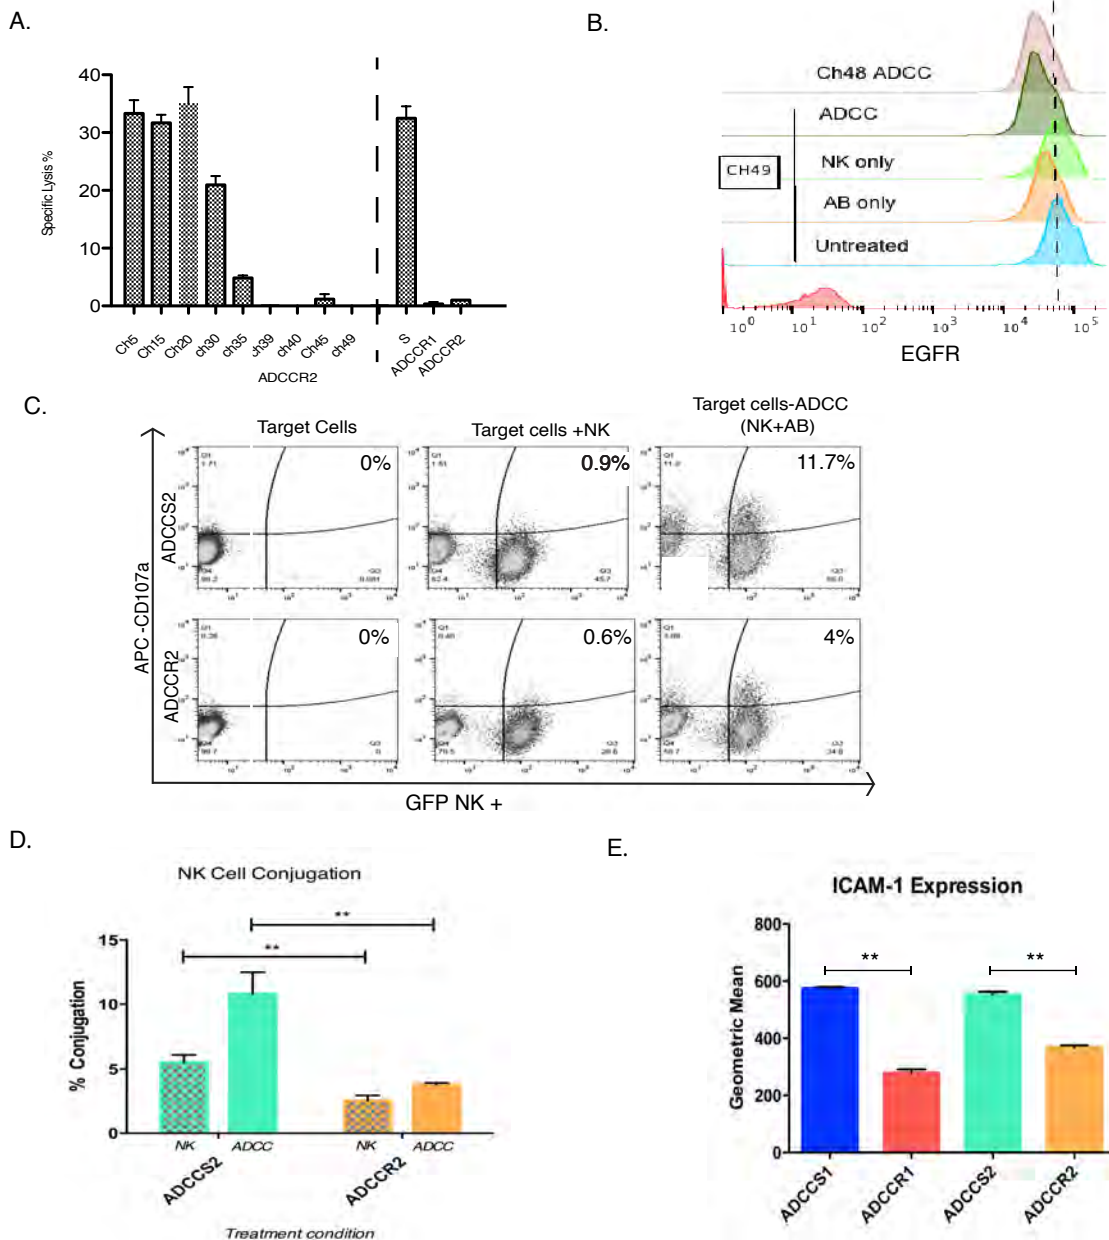

Supplemental Figure 7:

**Supplemental Table 2 : BD Lyoplate Geometric Mean Values in ADCCS1 and ADCCR1**

| <b>Cell surface molecule</b> | <b>Geometric Mean ADCCS1</b> | <b>Geometric Mean ADCCR1</b> | <b>Ratio</b> |
|------------------------------|------------------------------|------------------------------|--------------|
| CD99                         | 18                           | 106                          | 5.89         |
| CD227                        | 18                           | 71.3                         | 3.96         |
| CD24                         | 5.33                         | 11.4                         | 2.14         |
| CD11b                        | 4.92                         | 8.47                         | 1.72         |
| CD21                         | 4.78                         | 6.96                         | 1.46         |
| CD15                         | 42.4                         | 58.7                         | 1.38         |
| CD99R                        | 5.37                         | 6.96                         | 1.30         |
| CD105                        | 5.26                         | 6.2                          | 1.18         |
| CD29                         | 29.6                         | 34.7                         | 1.17         |
| CD15s                        | 4.96                         | 5.8                          | 1.17         |
| CD5                          | 4.89                         | 5.59                         | 1.14         |
| Cutaneous Lymph. Antigen     | 5.58                         | 6.3                          | 1.13         |
| CD6                          | 4.78                         | 5.26                         | 1.10         |
| CD19                         | 5.22                         | 5.74                         | 1.10         |
| CD22                         | 4.97                         | 5.43                         | 1.09         |
| CD13                         | 4.83                         | 5.27                         | 1.09         |
| CD2                          | 4.74                         | 5.16                         | 1.09         |
| CD23                         | 4.74                         | 5.14                         | 1.08         |
| CD26                         | 4.76                         | 5.15                         | 1.08         |
| CD1d                         | 4.78                         | 5.12                         | 1.07         |
| CD31                         | 5.57                         | 5.94                         | 1.07         |
| CD11c                        | 5.09                         | 5.42                         | 1.06         |
| CD35                         | 4.87                         | 5.16                         | 1.06         |
| CD28                         | 4.99                         | 5.28                         | 1.06         |
| CD85                         | 5.03                         | 5.32                         | 1.06         |
| CD49a                        | 10.7                         | 11.3                         | 1.06         |
| CD4                          | 4.69                         | 4.95                         | 1.06         |
| CD116                        | 5.15                         | 5.43                         | 1.05         |
| CD16                         | 4.74                         | 4.98                         | 1.05         |
| CD340 (HER2)                 | 212                          | 221                          | 1.04         |
| CD25                         | 4.97                         | 5.17                         | 1.04         |
| CD117                        | 5.14                         | 5.33                         | 1.04         |
| CD3                          | 4.77                         | 4.94                         | 1.04         |
| CD70                         | 5.15                         | 5.33                         | 1.03         |
| CD33                         | 5.11                         | 5.27                         | 1.03         |
| CD137                        | 6.25                         | 6.42                         | 1.03         |
| CD43                         | 5.85                         | 5.97                         | 1.02         |
| CD18                         | 5.08                         | 5.18                         | 1.02         |
| CD7                          | 4.96                         | 5.04                         | 1.02         |
| CD8a                         | 4.99                         | 5.02                         | 1.01         |
| CD1a                         | 5.04                         | 5.06                         | 1.00         |
| CD8b                         | 5.41                         | 5.43                         | 1.00         |
| CD114                        | 5.54                         | 5.56                         | 1.00         |
| CD103                        | 5.25                         | 5.26                         | 1.00         |



| <b>Cell surface molecule</b> | <b>Geometric Mean ADCCS1</b> | <b>Geometric Mean ADCCR1</b> | <b>Ratio</b> |
|------------------------------|------------------------------|------------------------------|--------------|
| CD121a                       | 5.31                         | 5.28                         | 0.99         |
| CDw93                        | 5.3                          | 5.26                         | 0.99         |
| CD87                         | 5.18                         | 5.13                         | 0.99         |
| CD86                         | 5.97                         | 5.91                         | 0.99         |
| CD89                         | 5.17                         | 5.09                         | 0.98         |
| CD90                         | 5.17                         | 5.08                         | 0.98         |
| CD108                        | 21.9                         | 21.5                         | 0.98         |
| CD106                        | 5.42                         | 5.31                         | 0.98         |
| CD122                        | 5.29                         | 5.17                         | 0.98         |
| CD57                         | 6.5                          | 6.25                         | 0.96         |
| CD123                        | 5.32                         | 5.11                         | 0.96         |
| CD38                         | 5.17                         | 4.95                         | 0.96         |
| CD267                        | 5.16                         | 4.92                         | 0.95         |
| CD137Ligand                  | 5.54                         | 5.26                         | 0.95         |
| CD127                        | 5.95                         | 5.64                         | 0.95         |
| CDw327                       | 5.47                         | 5.18                         | 0.95         |
| CD275 (B7-H2)                | 5.82                         | 5.51                         | 0.95         |
| Integrin                     | 5.36                         | 5.07                         | 0.95         |
| CD1b                         | 6.08                         | 5.75                         | 0.95         |
| CD294                        | 5.19                         | 4.89                         | 0.94         |
| CD120b                       | 5.23                         | 4.92                         | 0.94         |
| rlgG1                        | 5.29                         | 4.97                         | 0.94         |
| CD212                        | 5.26                         | 4.94                         | 0.94         |
| CD135                        | 5.67                         | 5.32                         | 0.94         |
| SSEA-3                       | 5.52                         | 5.17                         | 0.94         |
| CD231                        | 5.67                         | 5.31                         | 0.94         |
| CD278                        | 5.33                         | 4.99                         | 0.94         |
| CD45RB                       | 5.88                         | 5.49                         | 0.93         |
| CD36                         | 6.13                         | 5.71                         | 0.93         |
| TRA-1-81                     | 5.51                         | 5.11                         | 0.93         |
| CD229                        | 5.59                         | 5.17                         | 0.92         |
| CD336                        | 5.49                         | 5.07                         | 0.92         |
| CLIP                         | 5.4                          | 4.97                         | 0.92         |
| CD102                        | 5.65                         | 5.19                         | 0.92         |
| Invariant NKT                | 5.4                          | 4.96                         | 0.92         |
| CD14                         | 6.99                         | 6.33                         | 0.91         |
| CD124                        | 5.87                         | 5.31                         | 0.90         |
| rlgM                         | 5.37                         | 4.85                         | 0.90         |
| CD4v4                        | 6.03                         | 5.44                         | 0.90         |
| CD200                        | 5.71                         | 5.15                         | 0.90         |
| CD128b                       | 6.01                         | 5.42                         | 0.90         |
| CD235a                       | 5.95                         | 5.36                         | 0.90         |
| Vb 23                        | 5.54                         | 4.98                         | 0.90         |
| CD180                        | 5.8                          | 5.21                         | 0.90         |
| CD37                         | 5.75                         | 5.15                         | 0.90         |
| rlgG2a                       | 5.49                         | 4.91                         | 0.89         |
| CD282                        | 5.46                         | 4.85                         | 0.89         |

| <b>Cell surface molecule</b>  | <b>Geometric Mean ADCCS1</b> | <b>Geometric Mean ADCCR1</b> | <b>Ratio</b> |
|-------------------------------|------------------------------|------------------------------|--------------|
| CD88                          | 5.77                         | 5.09                         | 0.88         |
| CD220                         | 5.82                         | 5.12                         | 0.88         |
| CD184                         | 5.84                         | 5.11                         | 0.88         |
| CD69                          | 6.29                         | 5.5                          | 0.87         |
| γδTCR                         | 5.73                         | 5                            | 0.87         |
| CD27                          | 5.76                         | 5.01                         | 0.87         |
| CD41b                         | 5.94                         | 5.16                         | 0.87         |
| CD64                          | 10.7                         | 9.29                         | 0.87         |
| CD45RO                        | 6.57                         | 5.69                         | 0.87         |
| mIgG1                         | 5.68                         | 4.91                         | 0.86         |
| SSEA-1                        | 54.9                         | 47.4                         | 0.86         |
| CD118 (LIFRcptr)              | 6.73                         | 5.81                         | 0.86         |
| TRA-1-60                      | 6.13                         | 5.28                         | 0.86         |
| CD147                         | 584                          | 503                          | 0.86         |
| CD195                         | 6.28                         | 5.37                         | 0.86         |
| CD244                         | 6.02                         | 5.13                         | 0.85         |
| CMRF-44                       | 6.05                         | 5.15                         | 0.85         |
| CD197                         | 6.22                         | 5.28                         | 0.85         |
| CD144                         | 6.33                         | 5.37                         | 0.85         |
| mIgG2a                        | 5.77                         | 4.89                         | 0.85         |
| Disialo- ganglio-<br>side GD2 | 6.16                         | 5.22                         | 0.85         |
| CD152                         | 6.12                         | 5.18                         | 0.85         |
| CD134                         | 6.31                         | 5.34                         | 0.85         |
| CD120a                        | 7.32                         | 6.1                          | 0.83         |
| CD181                         | 6.22                         | 5.18                         | 0.83         |
| CD30                          | 6.08                         | 5.05                         | 0.83         |
| BLTR-1                        | 5.95                         | 4.94                         | 0.83         |
| CD226                         | 6.17                         | 5.12                         | 0.83         |
| mIgG2b                        | 6.01                         | 4.98                         | 0.83         |
| CD177                         | 7.05                         | 5.77                         | 0.82         |
| CD153                         | 6.19                         | 5.05                         | 0.82         |
| CD11a                         | 9.68                         | 7.89                         | 0.82         |
| CD172b                        | 7.47                         | 6.06                         | 0.81         |
| CD40                          | 266                          | 212                          | 0.80         |
| CD91                          | 6.62                         | 5.25                         | 0.79         |
| CD196                         | 6.75                         | 5.35                         | 0.79         |
| CD210                         | 6.33                         | 4.84                         | 0.76         |
| CD171                         | 6.96                         | 5.32                         | 0.76         |
| CD79b                         | 7.47                         | 5.7                          | 0.76         |
| CD209                         | 8.33                         | 6.3                          | 0.76         |
| CD279                         | 6.54                         | 4.93                         | 0.75         |
| SSEA-4                        | 6.71                         | 5.05                         | 0.75         |
| CD309                         | 6.53                         | 4.91                         | 0.75         |
| CD32                          | 7.01                         | 5.27                         | 0.75         |
| CD10                          | 8.62                         | 6.48                         | 0.75         |
| CD243(p-glyco                 | 7.25                         | 5.38                         | 0.74         |

| <b>Cell surface molecule</b> | <b>Geometric Mean ADCCS1</b> | <b>Geometric Mean ADCCR1</b> | <b>Ratio</b> |
|------------------------------|------------------------------|------------------------------|--------------|
| Protein)                     |                              |                              |              |
| CD42b                        | 7.34                         | 5.44                         | 0.74         |
| CD100                        | 7.54                         | 5.58                         | 0.74         |
| CD178                        | 7.03                         | 5.2                          | 0.74         |
| CD49b                        | 531                          | 392                          | 0.74         |
| NKB1                         | 6.97                         | 5.13                         | 0.74         |
| CD158a                       | 7.12                         | 5.17                         | 0.73         |
| HLA- A2                      | 6.86                         | 4.98                         | 0.73         |
| CD71                         | 197                          | 143                          | 0.73         |
| CD206                        | 7.2                          | 5.2                          | 0.72         |
| CD20                         | 7.16                         | 5.15                         | 0.72         |
| CD255(Tweak)                 | 7.26                         | 5.22                         | 0.72         |
| CD132                        | 7.15                         | 4.98                         | 0.70         |
| CD268                        | 9.8                          | 6.78                         | 0.69         |
| CD140a                       | 7.59                         | 5.25                         | 0.69         |
| CD94                         | 7.37                         | 5.09                         | 0.69         |
| CD146                        | 7.46                         | 5.14                         | 0.69         |
| CD150                        | 7.43                         | 5.11                         | 0.69         |
| CD183                        | 7.51                         | 5.15                         | 0.69         |
| MIC A/B                      | 34.5                         | 23.6                         | 0.68         |
| CD193                        | 8.59                         | 5.75                         | 0.67         |
| CD337                        | 7.92                         | 5.17                         | 0.65         |
| CD314 (NKG2D)                | 7.5                          | 4.87                         | 0.65         |
| CD84                         | 10.2                         | 6.62                         | 0.65         |
| CD55                         | 762                          | 483                          | 0.63         |
| CD62E                        | 8.75                         | 5.41                         | 0.62         |
| CD66f                        | 8.81                         | 5.38                         | 0.61         |
| Hem. Prog. Cell              | 8.4                          | 5.04                         | 0.60         |
| CD80                         | 15.2                         | 8.95                         | 0.59         |
| CD45RA                       | 10.3                         | 6.04                         | 0.59         |
| CD335 (NKP46)                | 8.63                         | 5.02                         | 0.58         |
| mIgM                         | 9.13                         | 5.26                         | 0.58         |
| CD58                         | 1448                         | 834                          | 0.58         |
| CD75                         | 10.5                         | 6                            | 0.57         |
| CD39                         | 9.5                          | 5.32                         | 0.56         |
| fmlp-Receptor                | 9.11                         | 5.07                         | 0.56         |
| CD47                         | 1068                         | 587                          | 0.55         |
| CD158b                       | 9.42                         | 5.17                         | 0.55         |
| CD97                         | 10.7                         | 5.84                         | 0.55         |
| Vb 8                         | 9.59                         | 5.19                         | 0.54         |
| CD48                         | 10.3                         | 5.44                         | 0.53         |
| CD59                         | 1201                         | 633                          | 0.53         |
| CD130                        | 80.4                         | 42.2                         | 0.52         |
| b7                           | 10.1                         | 5.25                         | 0.52         |
| CD151                        | 114                          | 57.2                         | 0.50         |
| CD119                        | 79.3                         | 39.4                         | 0.50         |
| CD77                         | 12.7                         | 6.27                         | 0.49         |

| <b>Cell surface molecule</b> | <b>Geometric Mean ADCCS1</b> | <b>Geometric Mean ADCCR1</b> | <b>Ratio</b> |
|------------------------------|------------------------------|------------------------------|--------------|
| CD112                        | 54.5                         | 26.6                         | 0.49         |
| CD221                        | 108                          | 52.1                         | 0.48         |
| CD273                        | 13.2                         | 6.32                         | 0.48         |
| CD49c                        | 1478                         | 707                          | 0.48         |
| CD107b                       | 20.7                         | 9.69                         | 0.47         |
| CD46                         | 1201                         | 559                          | 0.47         |
| CD162                        | 11.1                         | 5.08                         | 0.46         |
| HLA- DQ                      | 12.5                         | 5.7                          | 0.46         |
| CD163                        | 12                           | 5.46                         | 0.46         |
| mIgG3                        | 10.7                         | 4.85                         | 0.45         |
| CD53                         | 12.4                         | 5.6                          | 0.45         |
| HLA- A,B,C                   | 1126                         | 504                          | 0.45         |
| CD321<br>(F11Rcptr)          | 929                          | 415                          | 0.45         |
| HLA- DR,DP, DQ               | 12.1                         | 5.37                         | 0.44         |
| CD305 (LAIR-1)               | 11.2                         | 4.85                         | 0.43         |
| CD66(a,c,d,e)                | 35.5                         | 14.8                         | 0.42         |
| CD107a                       | 22                           | 9.1                          | 0.41         |
| CD109                        | 95.5                         | 39                           | 0.41         |
| CD81                         | 1748                         | 711                          | 0.41         |
| CD74                         | 15.4                         | 6.1                          | 0.40         |
| CD41a                        | 13.8                         | 5.33                         | 0.39         |
| CD9                          | 1100                         | 388                          | 0.35         |
| CD51/61                      | 15.7                         | 5.43                         | 0.35         |
| CD165                        | 15.5                         | 5.34                         | 0.34         |
| CD271                        | 29.1                         | 9.84                         | 0.34         |
| CD142                        | 2132                         | 688                          | 0.32         |
| CD62P                        | 17.6                         | 5.55                         | 0.32         |
| CMRF-56                      | 16.2                         | 5.07                         | 0.31         |
| CD205                        | 58.6                         | 18.3                         | 0.31         |
| CD49d                        | 19.7                         | 6.09                         | 0.31         |
| CD140b                       | 16.3                         | 4.99                         | 0.31         |
| EGFR                         | 1987                         | 605                          | 0.30         |
| CD44                         | 2577                         | 778                          | 0.30         |
| CD164                        | 283                          | 83.7                         | 0.30         |
| CD95                         | 739                          | 209                          | 0.28         |
| CD274                        | 220                          | 56.4                         | 0.26         |
| rlgG2b                       | 19.5                         | 4.87                         | 0.25         |
| CD54                         | 969                          | 236                          | 0.24         |
| CD154                        | 21.9                         | 5.07                         | 0.23         |
| CD73                         | 817                          | 188                          | 0.23         |
| CDw328                       | 22.2                         | 5.04                         | 0.23         |
| b2micro globulin             | 308                          | 69.1                         | 0.22         |
| CD66b                        | 25.2                         | 5.57                         | 0.22         |
| CD166                        | 605                          | 133                          | 0.22         |
| CD104                        | 806                          | 169                          | 0.21         |
| abTCR                        | 24.9                         | 5.09                         | 0.20         |

| <b>Cell surface molecule</b> | <b>Geometric Mean ADCCS1</b> | <b>Geometric Mean ADCCR1</b> | <b>Ratio</b> |
|------------------------------|------------------------------|------------------------------|--------------|
| CD62L                        | 28                           | 5.67                         | 0.20         |
| CD326                        | 1109                         | 218                          | 0.20         |
| CD56                         | 27.5                         | 5.4                          | 0.20         |
| CD161                        | 26.2                         | 4.95                         | 0.19         |
| CD83                         | 39                           | 7.36                         | 0.19         |
| CD72                         | 32.3                         | 5.81                         | 0.18         |
| CD138                        | 1096                         | 189                          | 0.17         |
| CD50                         | 35.9                         | 5.94                         | 0.17         |
| CD63                         | 434                          | 64.4                         | 0.15         |
| CD201                        | 143                          | 20.6                         | 0.14         |
| HLA- DR                      | 40.6                         | 5.39                         | 0.13         |
| CD49f                        | 1362                         | 178                          | 0.13         |
| CD45                         | 51                           | 5.59                         | 0.11         |
| CD49e                        | 338                          | 36.6                         | 0.11         |
| CDw329                       | 54.1                         | 4.94                         | 0.09         |
| CD141                        | 546                          | 49.5                         | 0.09         |
| CD34                         | 73.9                         | 5.33                         | 0.07         |
| CD42a                        | 83.5                         | 5.63                         | 0.07         |
| CD338 (ABCG2)                | 127                          | 6.72                         | 0.05         |
| CD126                        | 118                          | 5.92                         | 0.05         |
| CD61                         | 193                          | 5.83                         | 0.03         |
